# Supplementary material
Source: MDPI journal article supplement (https://www.mdpi.com/2073-4344/10/8/893)
Supplement: s1 [file s1]

## Supplementary Materials

### Low temperature synthesis of photoactive mesoporous TiO<sub>2</sub> nanomaterials

Massimo Dell'Edera,<sup>1,2</sup> Francesca Petronella,<sup>1,‡</sup> Alessandra Truppi,<sup>1,§</sup> Leonarda Francesca Liotta,<sup>3</sup> Nunzio Galli,<sup>3</sup> Teresa Sibillano,<sup>4</sup> Cinzia Giannini,<sup>4</sup> Rosaria Brescia,<sup>5</sup> Francesco Milano,<sup>6</sup> Marinella Striccoli,<sup>1</sup> Angela Agostiano,<sup>1,2</sup> M. Lucia Curri<sup>1,2,\*</sup> and Roberto Comparelli<sup>1,\*</sup>

<sup>1</sup> CNR-IPCF, Istituto per i Processi Chimico-Fisici, S.S. Bari, c/o Dip. Chimica Via Orabona 4, 70126, Bari, Italy

<sup>2</sup> Università degli Studi di Bari, Dip. Chimica, Via Orabona 4, 70126, Bari, Italy

<sup>3</sup> Istituto per lo Studio dei Materiali Nanostrutturati (ISMN)-CNR, via Ugo La Malfa, 153, 90146, Palermo, Italy

<sup>4</sup> CNR-IC, Istituto di Cristallografia, Via Amendola 122/O, 70126, Bari, Italy

<sup>5</sup> Electron Microscopy Facility, Istituto Italiano di Tecnologia (IIT), via Morego 30, 16163 Genova (Italy)

<sup>6</sup> CNR-ISPA Istituto di Scienze delle Produzioni Alimentari, Consiglio Nazionale delle Ricerche, S.P. Lecce-Monteroni, 73100 Lecce, Italy

<sup>‡</sup> Present address: CNR - IC, Istituto di Cristallografia, S.S. Roma, Via Salaria Km 29,300, 00015 Monterotondo – Rome, Italy

<sup>§</sup> Present address: TCT - Nanotech division, TCT s.r.l. Strada per Pandi, 3 72100 Brindisi, Italy

\*Corresponding authors: marialucia.curri@uniba.it; roberto.comparelli@cnr.it

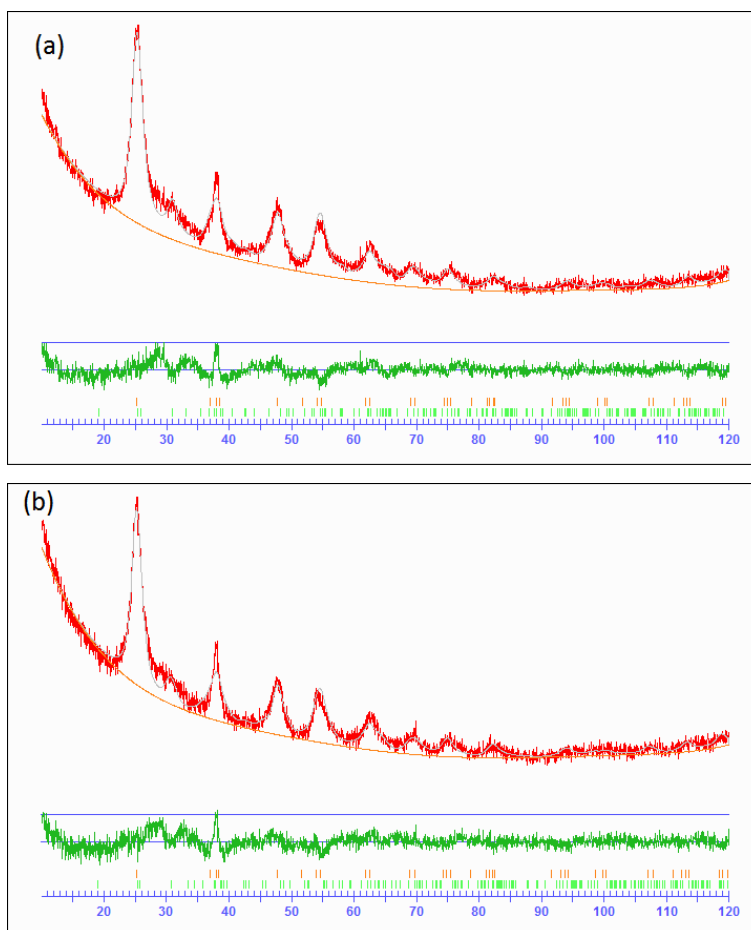

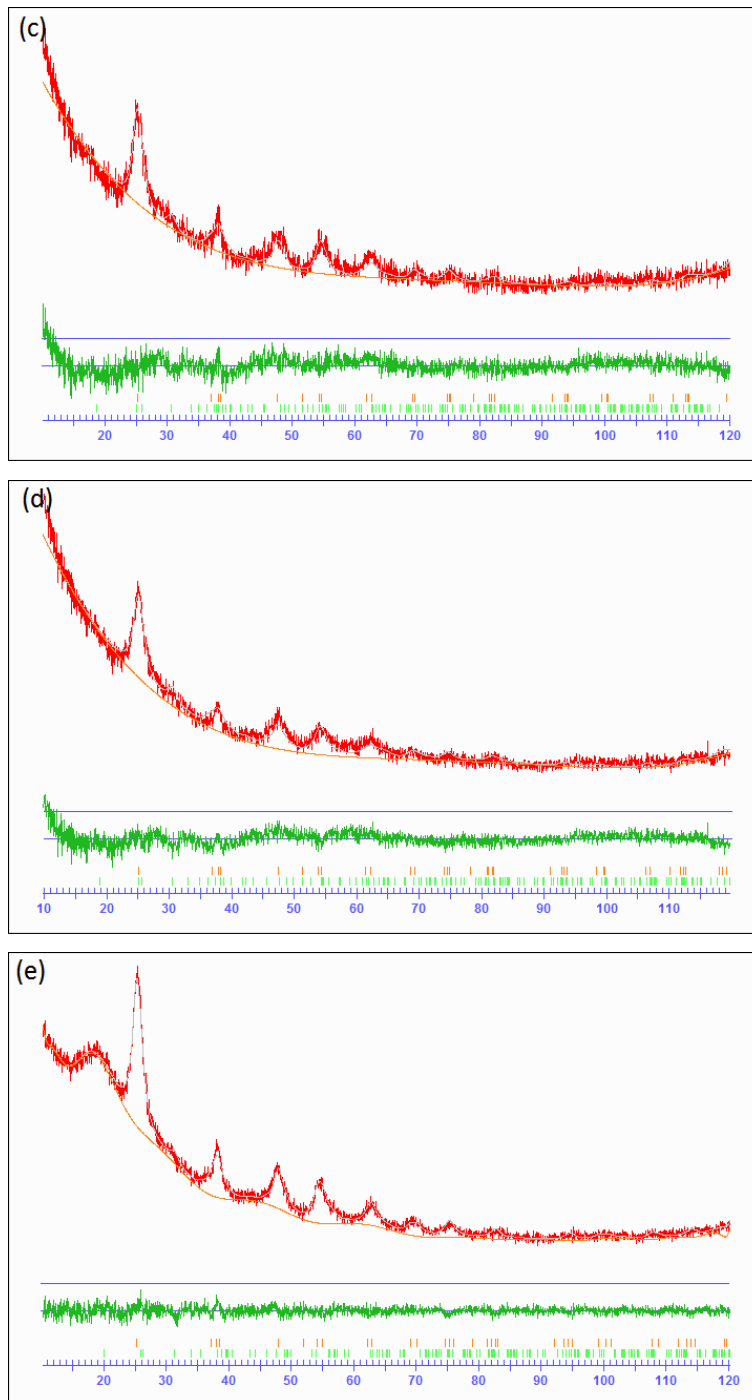

Figure S1: Quantitative phase analysis performed by Quanto <sup>[1]</sup> performed on the XRD patterns at (a)2h, (b)4h, (c)8h, (d)16h, (e)24h of thermal treatment. In each graph the red curve is the experimental one; the grey curve is the fitted profile; the orange curve is the interpolated background; the green curve is the difference profiles. Orange and green bars indicate anatase and brookite hkl reflection, respectively.

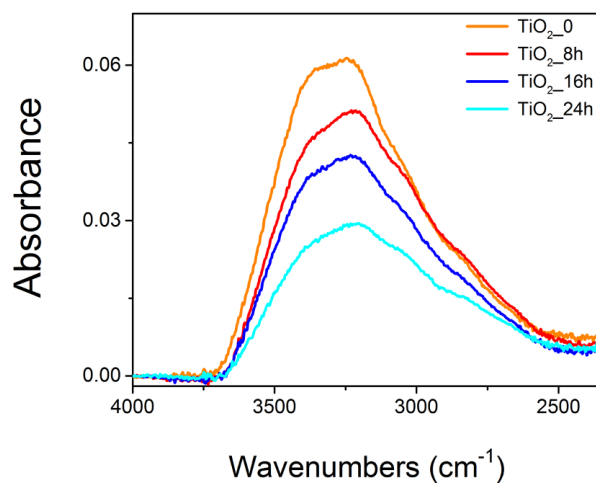

Figure S2: FTIR Spectra measured in ATR mode of TiO<sub>2</sub>\_0 (orange line); TiO<sub>2</sub>\_8h (red); TiO<sub>2</sub>\_16h (blue); TiO<sub>2</sub>\_24h (light blue) in the range 4000 – 2300 cm<sup>-1</sup>.

The results of the comparison of the photoactivity of the prepared photocatalyst sample with that of TiO<sub>2</sub> P25, tested as a commercial benchmark are reported in Figure S3, pointing out that the decolouration extent for the reaction assisted by TiO<sub>2</sub> P25 ( $83 \pm 5$  %) is slightly higher than that obtained when TiO<sub>2</sub>\_16h sample is used ( $72 \pm 4$  %). However a decisive assessment could not be safely performed, considering the different characteristics of the investigated photocatalyst with respect to the commercially available counterpart. In fact, the difference in terms of granulometry between the commercial TiO<sub>2</sub> P25 and the prepared TiO<sub>2</sub> make inconsistent the comparison between their photocatalytic activity. Such different features result in a different dispersibility of the two photocatalysts in the MB solution, much higher for the TiO<sub>2</sub> P25 than for the proposed photocatalyst (Figure S4). Moreover, the different amount of MB adsorbed at the surface of the photocatalyst, measured by the experiment carried out in the dark, is also critical. Indeed, TiO<sub>2</sub> P25 showed an absorption value ( $6 \pm 1$  %) much lower than that found for the synthesized photocatalyst, therefore, it is not straightforward to carry out a reliable comparison of the photocatalytic efficiency between the prepared photocatalyst and the commercial one.

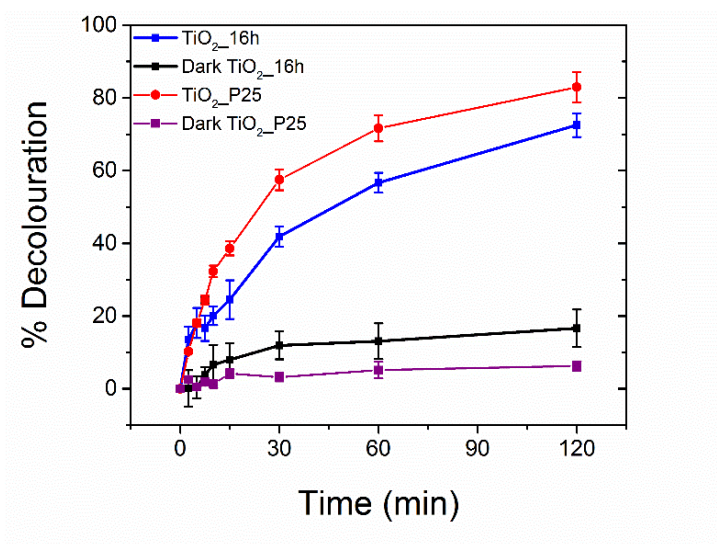

Figure S3: Time course evolution of Methylene Blue (MB) decolouration at pH 6, under UV assisted by TiO<sub>2</sub>\_16h (blue line), TiO<sub>2</sub>\_P25 (red line). Control experiments in dark condition are reported for TiO<sub>2</sub>\_16h (black line) for TiO<sub>2</sub> P25 (violet line). Experimental data are presented as mean values  $\pm$  standard deviation obtained from the analysis of five replicates.

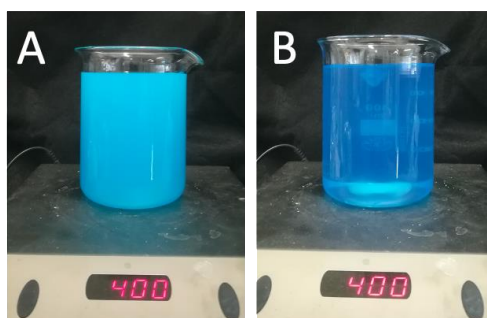

Figure S4: Pictures of MB solution  $10^{-5}$  M containing photocatalyst TiO<sub>2</sub> P25 (panel A) and TiO<sub>2</sub>\_16h (panel B)

## References

- [1] A. Altomare, M. C. Burla, C. Giacovazzo, A. Guagliardi, A. G. G. Moliterni, G. Polidori, R. Rizzi, *J. Appl. Crystallogr.* **2001**, *34*, 392-397.
